# Supplementary material for: Combining double-hybrid functionals with rSCAN yields solid-state 13C chemical shifts with sub-ppm accuracy
Source: Royal Society of Chemistry journal article supplement (doi:10.1039/d5cp01111f), 2025-01-01
Supplement: d5cp01111f2.xlsx [file d5cp01111f2.xlsx]

## Sheet: Carbon Chemical Shifts
Error statistics for corrections to different GIPAW calculations on sets of geometries.
Molecule	Experimental Shift	Full Width at Half Maximum	Environment		Geometry			Unoptimised Structure		rSCAN H Atoms Only		PBE H Atoms Only		BLYP H Atoms Only		rSCAN Unfixed Cell		PBE+D3 Unfixed Cell		PBE Unfixed Cell		PBE+D3 Fixed Cell		rSCAN Fully Optimised Geometry
					GIPAW Calculation			PBE	rSCAN	PBE	rSCAN	PBE	rSCAN	PBE	rSCAN	PBE	rSCAN	PBE	rSCAN	PBE	rSCAN	PBE	rSCAN	PBE GIPAW
					Correction			None	None	None	None	None	None	None	None	None	None	None	None	None	None	None	None	None	PBE0	PBE0 Cluster	PBE0-CPCM Cluster	PBE0 On Cluster Directly	PBE0-CPCM On Cluster Directly	PBE0-CPCM Cluster Optimisation	PBE0-CPCM on Optimised Cluster Directly	PBE0-SMD	PBE0-CPCM	PBE0 Optimised Molecule	B3LYP	B3LYP-SMD	B3LYP-CPCM	CAM-B3LYP	rSCAN		rSCAN-SMD		rSCAN-CPCM		SCAN		r2SCAN		TPSS
																																							+MS	+D	+MS	+D	+MS	+D	+MS	+D	+MS	+D	+MS
Shieldings
LALNIN12	177.9	0.34	COO					-3.43	11.81	-3.45	11.79	-3.59	11.67	-3.52	11.73	-5.36	10.11	-9.36	6.48	-8.46	7.16	-9.45	6.36	-5.15	-5.939	-5.283	-6.059	4.291	3.174	-6.209	7.555	-6.383	-6.388	-9.326	-11.113	-11.526	-11.525	-11.797	3.282	0.989	3.595	1.042	3.48	0.971	4.132	1.735	5.036	3.169	-1.698
	51.1	0.56	CN					123.55	129.31	123.32	129.1	122.59	128.42	123.08	128.87	123.82	129.58	121.3	127.29	120.3	126.31	121.17	127.12	123.6	126.383	129.138	128.72	135.681	135.545	128.055	137.083	128.249	128.104	127.481	120.201	121.881	121.762	122.33	127.355	126.99	128.22	127.879	128.142	127.804	127.97	127.532	128.736	128.15	124.999
	20.5	0.4	CH3					157.85	162.72	156.23	161.22	154.45	159.58	155.44	160.5	155.35	160.39	153.92	159.11	153.58	158.81	154.2	159.36	155.81	160.852	160.828	160.895	165.457	166.534	160.932	167.701	160.502	160.51	160.436	155.218	154.923	154.956	159.014	162.106	161.292	161.853	161.064	161.861	161.068	162.606	161.409	162.3	161.278	157.201
LASCAC10	174.9	0.55	OCOH					1.46	15.88	-0.22	14.34	-0.38	14.19	-0.4	14.18	-1.5	13.14	-4.82	10.15	-4.47	10.46	-4.62	10.34	-0.99	-1.687	-1.795	-1.942	11.568	10.277	-1.711	11.331	-2.039	-1.955	-0.324	-6.998	-7.447	-7.33	-7.951	7.689	5.135	7.708	5.154	7.696	5.144	8.491	5.825	9.738	7.945	2.733
	118.6	0.52	COH					52.9	65.63	51.82	64.7	51.63	64.53	51.68	64.58	54.13	66.86	51.07	64.17	51.49	64.39	50.35	63.49	52.86	55.873	56.297	56.33	67.95	68.112	56.564	69.927	56.297	56.202	54.696	50.369	50.717	50.632	51.96	61.725	59.454	61.896	59.577	61.856	59.55	62.585	60.176	64.315	62.591	57.04
	152.4	0.44	COH					20.87	33.78	17.25	30.44	16.96	30.17	16.98	30.19	15.16	28.43	11.52	25.17	12.98	26.59	11.87	25.52	15.31	15.8	15.094	15.057	30.04	28.624	15.431	30.755	15.223	15.325	12.957	10.099	9.571	9.684	10.401	23.017	20.438	23.022	20.364	22.987	20.36	23.9	21.165	25.54	23.343	19.681
	75.7	0.5	OCC					96.63	104.57	95.3	103.36	94.75	102.87	95.08	103.17	96.8	104.8	93.85	102.1	94.05	102.24	93.8	102.04	96.43	102.453	102.016	102.014	112.576	112.075	102.111	112.013	102.299	102.316	102.181	96.311	96.174	96.2	99.886	102.262	101.691	102.256	101.636	102.238	101.633	103.032	102.37	103.891	103.214	99.607
	68.27	0.65	CCOH					113.45	120.07	102.51	109.93	101.77	109.24	102.24	109.68	102.91	110.3	100	107.66	99.34	107.07	99.84	107.52	103.13	110.415	110.097	110.237	119.676	119.081	110.294	119.144	110.466	110.452	109.823	103.775	103.812	103.815	107.961	108.735	108.153	108.74	108.148	108.733	108.146	109.495	108.827	110.132	109.289	106.456
	60.4	0.54	COH					123.48	129.79	111.05	118.32	109.81	117.17	110.51	117.82	111.77	118.93	109.41	116.79	108.09	115.59	109.26	116.64	111.76	118.224	117.925	117.951	125.353	125.274	118.016	125.736	118.196	118.212	119.029	111.802	111.713	111.756	115.617	117.795	117.046	117.753	117.015	117.761	117.025	118.479	117.557	118.886	117.981	114.862
	174.9	0.55	OCOH					1.27	15.62	0.47	14.9	0.33	14.77	0.3	14.74	-1.69	12.84	-4.71	10.13	-4.36	10.5	-4.45	10.48	-1.21	-1.709	-2.326	-2.332	7.467	7.383	-2.253	8.303	-2.171	-2.084	2.02	-7.036	-7.604	-7.486	-7.808	7.417	4.872	7.493	4.923	7.466	4.905	8.209	5.559	9.429	7.237	2.481
	118.6	0.52	COH					55.08	67.64	53.03	65.8	52.86	65.64	52.9	65.68	54.01	66.71	50.81	63.76	51.44	64.44	50.19	63.18	52.84	55.887	56.741	56.803	66.423	66.608	56.714	67.627	56.391	56.319	55.865	50.394	50.83	50.76	52.039	61.576	59.312	61.806	59.505	61.766	59.475	62.445	60.063	64.236	62.2	57.069
	155.7	0.49	COH					14.76	28.16	13.85	27.31	13.6	27.08	13.74	27.21	11.03	24.58	9.18	23.03	10.08	23.83	9.35	23.23	11.97	12.424	11.507	11.552	22.265	22.157	11.686	23.562	11.795	11.864	20.291	6.748	6.121	6.212	6.958	19.854	17.22	19.888	17.175	19.851	17.163	20.747	17.963	22.346	20.596	16.412
	76.6	0.5	OCC					97.18	105.13	93.7	101.96	93.2	101.51	93.5	101.78	95.67	103.8	92.33	100.75	92.49	100.87	92.19	100.61	94.88	100.85	100.967	100.94	109.221	108.87	100.939	110.255	100.73	100.732	101.958	94.736	94.637	94.65	98.266	100.74	100.08	100.786	100.062	100.756	100.049	101.518	100.776	102.449	101.885	98.074
	68.1	0.65	CCOH					108.46	115.43	101.54	108.95	100.77	108.24	101.22	108.66	103.28	110.58	100.47	108	99.71	107.35	100.41	107.93	103.71	110.75	110.634	110.672	117.225	117.212	110.747	115.892	110.796	110.778	109.412	104.153	104.197	104.2	108.198	109.148	108.63	109.158	108.64	109.143	108.631	109.884	109.282	110.62	110.174	107.022
	59.1	0.56	COH					123.36	129.67	113.12	120.17	111.96	119.09	112.64	119.72	113.73	120.74	111.27	118.51	110.44	117.77	110.97	118.25	113.47	119.564	119.923	119.883	125.197	125.362	119.933	127.013	119.611	119.593	121.146	113.363	113.34	113.353	117.029	119.28	118.511	119.305	118.534	119.291	118.521	119.949	119.029	120.327	119.039	116.314
ACSALA	122.11	0.91	C					49.25	63.19	49.2	63.14	49.25	63.18	49.25	63.19	50.31	64.18	47.79	61.86	47.43	61.55	47.96	62	50.43	52.464	53.082	53.233	62.09	62.839	53.176	63.88	52.671	52.654	52.193	47.181	47.317	47.32	47.74	60.182	57.54	60.263	57.639	60.244	57.622	61.186	58.394	63.048	60.837	55.216
	152.95	0.64	CO					14.62	29.07	14.57	29.02	14.65	29.09	14.61	29.06	15.25	29.62	12.66	27.3	12.34	27.11	12.74	27.35	15.46	17.971	17.914	17.932	25.914	26.97	18.007	29.671	18.057	18.041	18.776	11.983	12.058	12.051	12.734	24.445	21.467	24.408	21.451	24.419	21.454	25.44	22.322	26.497	23.868	20.441
	125.31	0.81	CH					45.88	60.59	45.91	60.62	45.49	60.23	45.75	60.47	46.76	61.42	44.32	59.16	44.07	58.83	44.34	59.18	46.86	48.763	48.769	48.826	58.093	58.334	48.642	58.523	48.72	48.723	49.076	43.951	43.983	43.964	44.367	57.176	54.019	57.261	54.053	57.24	54.038	58.181	54.799	59.483	56.932	52.118
	138.5	0.85	CH					31.09	45.83	30.95	45.71	30.43	45.23	30.7	45.48	31.91	46.58	29.9	44.73	32.16	46.81	29.73	44.55	31.83	32.374	32.478	32.344	44.494	42.95	32.387	42.918	32.246	32.254	32.265	27.815	27.815	27.785	27.31	41.166	37.913	41.275	37.913	41.249	37.904	42.08	38.632	42.757	40.128	37.119
	127.77	0.84	CH					42.11	57.1	42.83	57.75	42.42	57.38	42.62	57.56	44.04	58.87	41.49	56.53	42.82	57.64	41.34	56.4	43.83	45.816	45.852	45.839	59.133	57.911	45.776	56.809	45.761	45.754	46.018	41.028	41.072	41.035	41.512	53.924	50.671	54.03	50.714	53.999	50.692	54.951	51.474	56.534	53.903	49.303
	134.54	0.59	CH					36.26	50.61	36.42	50.75	36.11	50.45	36.39	50.72	36.57	50.89	34.26	48.78	34.94	49.47	34.15	48.66	36.23	37.067	37.023	36.971	49.465	48.695	37.104	48.568	37.048	37.055	38.498	32.343	32.373	32.366	32.033	45.968	42.653	45.935	42.637	45.938	42.638	46.892	43.421	47.514	44.743	41.64
	170.87	0.94	COO					3.1	17.87	3	17.79	2.76	17.57	2.96	17.75	1.13	16.05	-2.62	12.67	-3.01	12.35	-2.49	12.79	1.3	0.567	0.895	0.862	11.424	11.071	0.885	12.253	0.467	0.5	3.387	-4.487	-4.681	-4.629	-5.113	9.574	7.143	9.697	7.284	9.665	7.25	10.369	7.821	11.273	8.669	4.663
	172.23	0.63	CO					-2.52	12.59	-2.62	12.5	-2.47	12.64	-2.43	12.68	-2.62	12.25	-6.75	8.75	-4.38	10.67	-6.98	8.51	-3.38	-3.402	-3.93	-3.805	4.357	4.419	-3.561	7.231	-3.679	-3.626	-0.593	-8.871	-9.135	-9.077	-8.524	5.281	2.554	5.541	2.705	5.468	2.659	6.15	3.32	7.085	4.663	0.036
	19.79	0.84	CH3					157.76	163.1	155.82	161.32	154.54	160.15	155.26	160.81	156.79	162.17	154.37	159.98	155.84	161.17	154.13	159.77	156.39	159.909	161.37	161.307	172.565	173.945	160.606	165.691	159.925	159.926	158.643	155.116	155.111	155.123	157.95	162.545	161.439	162.605	161.471	162.59	161.464	163.03	161.455	162.807	161.448	157.207
LCYSTN21	173.55	0.35	COO					2.64	16.9	1.85	16.25	1.7	16.12	1.75	16.17	0.02	14.57	-3.82	11.07	-2.52	12.23	-3.82	11.1	-0.12	-1.008	-0.725	-1.534	10.542	8.152	-1.52	9.455	-1.725	-1.695	-5.716	-6.113	-6.772	-6.753	-6.799	8.134	5.915	8.273	5.822	8.182	5.771	8.917	6.589	9.739	7.543	3.106
	28.28	0.62	CS					160.18	163.75	144.82	149.61	143.75	148.62	144.46	149.29	144.29	149.09	142.2	147.19	143.14	148.02	142.54	147.5	144.84	151.756	151.113	151.242	156.607	156.87	151.271	157.362	151.086	151.107	151.011	145.155	144.684	144.707	150.498	150.984	150.619	150.498	150.152	150.521	150.169	151.591	151.026	151.695	151.02	147.221
	56.19	0.92	CN					123.75	129.65	117.53	123.89	116.76	123.18	117.18	123.56	118.17	124.46	115.71	122.2	115.26	121.71	115.82	122.29	118.08	120.698	123.279	123.372	131.019	130.713	123.342	131.477	122.575	122.436	119.677	114.694	116.366	116.23	116.582	121.807	121.361	122.732	122.302	122.659	122.233	122.406	121.909	123.079	122.817	119.424
CYTSIN	159.64	1.37	CO					18	30.76	17.29	30.02	17.28	30	17.3	30.03	16.53	29.24	13.38	26.4	12.54	25.65	13.52	26.52	16.54	15.405	15.478	15.46	24.795	24.683	15.525	25.289	15.324	15.325	21.211	10.113	9.889	9.907	8.968	23.903	21.804	24.053	22.003	24.019	21.966	24.547	22.362	25.096	23.208	19.404
	167.8	1.17	NCN					10.53	23.82	9.09	22.35	9.19	22.43	9.2	22.44	9.53	22.77	7.04	20.49	6.87	20.33	7.05	20.49	9.19	7.161	7.187	7.138	17.909	17.959	7.196	18.775	7.126	7.115	9.419	1.805	1.663	1.665	-0.588	16.821	14.254	16.873	14.408	16.85	14.384	17.582	14.919	18.023	15.811	12.652
	92.73	0.59	CH					88.33	99.72	81.4	93.35	80.77	92.78	81.06	93.04	81.02	93.08	78.21	90.56	77.15	89.42	78.66	90.9	81.09	83.734	84.634	84.599	92.135	92.298	84.564	92.031	84.156	84.087	84.569	79.129	79.395	79.356	80.698	89.792	87.319	90.313	87.733	90.217	87.653	90.826	88.065	92.532	90.338	85.421
	144.72	0.92	CN					30.11	42.66	29.28	41.79	28.78	41.33	29.08	41.61	28.63	41.13	26.58	39.26	28.2	40.64	26.34	39.03	28.61	27.223	27.362	27.246	38.687	37.85	27.336	38.862	27.013	27.022	28.143	22.831	22.691	22.677	21.363	35.765	33.086	35.963	33.165	35.918	33.142	36.451	33.591	36.561	34.329	32.672
GLUCSA11	92.85	0.25	OCO					79.1	88.42	72.54	82.42	71.95	81.88	72.33	82.22	76.15	85.55	73.05	82.79	72.08	81.86	73.33	83.06	76.55	84.441	84.078	84.026	92.507	92.784	84.052	92.518	84.37	84.387	86.108	77.542	77.516	77.532	81.563	83.334	82.384	83.235	82.301	83.254	82.319	84.212	83.172	84.642	83.62	80.469
	70.43	0.3	COH					107.91	115.04	101.83	109.26	101.03	108.51	101.43	108.88	102.46	109.82	99.83	107.44	98.4	106.15	100.1	107.69	102.45	109.605	109.109	109.047	117.211	117.05	109.279	117.4	109.502	109.528	110.578	102.698	102.598	102.639	106.601	108.549	107.942	108.459	107.837	108.483	107.862	109.402	108.719	109.993	109.472	106.22
	72.57	0.27	COH					110.2	116.98	98.83	106.32	97.93	105.49	98.42	105.95	100.06	107.39	97.03	104.66	95.92	103.69	97.33	104.92	99.3	106.622	106.225	106.207	114.119	114.411	106.167	113.672	106.47	106.504	109.692	99.62	99.489	99.545	103.67	105.458	104.73	105.323	104.618	105.346	104.638	106.32	105.501	106.955	106.135	103.232
	73	0.29	COH					108.66	115.52	99.29	106.85	98.5	106.11	99.01	106.58	98.68	106.31	96.43	104.26	95.49	103.46	96.62	104.43	98.5	105.902	105.226	105.128	112.681	113.751	105.183	115.591	105.865	105.877	107.999	98.774	98.799	98.832	102.722	104.851	104.096	104.761	104.049	104.767	104.052	105.785	104.939	106.568	105.737	102.618
	71.57	0.25	CO					103.08	110.54	95.36	103.33	94.59	102.62	95.07	103.07	100.68	108.17	98.03	105.8	97.46	105.28	98.2	105.95	100.79	107.342	106.988	107.034	115.673	115.622	107.026	116.247	107.274	107.294	106.294	100.731	100.629	100.668	104.457	106.564	106.055	106.521	105.995	106.533	106.009	107.368	106.79	107.999	107.639	104.356
	63.64	0.25	COH					122.42	128.69	107.17	114.61	106	113.54	106.71	114.19	107.81	115.17	105.56	113.13	105.16	112.83	105.97	113.52	107.96	114.8	114.63	114.544	122.001	122.529	114.476	123.604	114.644	114.681	115.021	108.27	108.097	108.159	112.158	114.184	113.348	114.089	113.254	114.105	113.272	114.892	113.91	115.312	114.392	111.357
HXACAN26	132.84	0.88	CN					37.82	50.28	41.78	53.82	41.89	53.9	41.97	53.98	40.89	53.04	38.24	50.56	38.91	51.28	38.4	50.73	40.95	42.343	42.351	42.436	50.046	51.341	42.459	51.925	42.358	42.343	41.065	36.554	36.514	36.507	36.947	48.86	46.594	48.868	46.585	48.861	46.58	49.812	47.436	50.951	49.276	45.285
	123.31	0.55	CH					54.2	67.44	49.7	63.05	49.25	62.64	49.58	62.94	49.28	62.65	46.92	60.5	48.09	61.54	47.03	60.57	49.35	49.964	50.72	50.715	62.409	62.583	50.359	61.228	50.143	50.115	52.42	45.24	45.406	45.377	44.793	58.424	55.606	58.42	55.661	58.405	55.639	59.257	56.296	59.956	57.906	54.037
	115.64	0.59	CH					53.08	66.59	58.36	71.24	57.98	70.88	58.2	71.09	57.62	70.59	55.24	68.37	56.05	69.11	55.54	68.66	57.73	58.534	59.409	59.298	70.781	69.179	58.964	69.509	58.709	58.681	58.661	53.939	54.156	54.121	53.901	66.783	63.959	66.789	64.009	66.773	63.988	67.686	64.602	68.555	66.372	62.371
	152.15	0.69	CO					17.09	31.88	16.55	31.08	16.54	31.07	16.51	31.04	17.87	32.11	16.4	30.82	14.65	29.21	15.88	30.33	17.95	19.949	20.016	20.018	33.699	31.326	20.225	31.929	20.157	20.104	20.784	13.762	14.042	13.983	13.962	26.843	24.241	26.936	24.312	26.905	24.286	27.821	25.123	28.751	26.721	22.881
	116.29	0.51	CH					53.3	66.61	56.29	69.17	55.72	68.64	55.89	68.8	57.86	70.66	55.05	68.08	56.56	69.49	55.3	68.33	57.93	59.593	59.107	59.133	68.782	68.776	59.55	69.853	59.417	59.428	60.849	54.931	54.868	54.858	55.472	67.059	64.33	67.179	64.37	67.145	64.343	67.956	64.974	68.856	66.688	62.417
	120.51	0.7	CH					58.65	71.56	54.6	67.61	54.05	67.1	54.28	67.32	52.52	65.66	50.79	64.11	50.63	63.85	50.59	63.92	52.14	53.517	53.045	53.166	59.025	61.049	53.492	62.949	53.379	53.372	55.996	48.723	48.631	48.61	48.745	61.21	58.462	61.373	58.537	61.332	58.504	62.054	59.087	62.816	60.696	56.862
	169.86	1	NCO					7.63	21.31	6.79	20.52	7.06	20.74	7.13	20.81	6.07	19.64	2.9	16.79	2.95	16.82	3.09	17	6.24	4.276	4.003	3.903	13.415	13.087	3.996	13.626	3.924	3.985	7.978	-0.8	-1.134	-1.07	-2.44	14.105	11.476	14.247	11.548	14.204	11.521	14.91	12.153	15.643	13.087	9.478
	23.73	0.83	CH2					167.54	172.02	152.74	158.32	151.4	157.09	152.18	157.81	154.27	159.68	151.84	157.43	152.91	158.36	152.19	157.76	154.29	157.828	158.479	158.453	163.837	164.206	158.397	164.146	157.982	157.969	156.139	152.985	153.09	153.091	155.752	160.491	159.376	160.622	159.485	160.605	159.471	160.996	159.396	160.874	159.559	155.299
PYRIDO11	164.27	0.86	CO					9.74	23.73	9.91	23.81	10.06	23.93	10	23.89	12.44	26.03	9.71	23.6	10.03	23.73	9.68	23.5	12.4	10.582	10.973	10.989	21.055	20.996	11.037	21.397	10.654	10.634	14.142	5.294	5.242	5.242	3.523	20.167	17.739	20.331	17.942	20.293	17.902	20.865	18.328	21.312	19.195	15.714
	121.78	0.53	CH					52.58	67.52	49.2	64.28	48.78	63.89	49	64.09	50.59	65.55	47.82	63.02	49.1	64.23	48.14	63.3	50.59	54.011	54.095	54.302	60.353	63.781	54.308	63.243	54.454	54.39	54.688	49.143	49.606	49.551	50.751	61.664	58.351	61.778	58.567	61.746	58.52	62.894	59.345	65.269	62.584	56.522
	143.18	0.53	CH					36.18	50.02	29.66	43.98	29.21	43.56	29.43	43.77	29.35	43.65	27.05	41.57	28.03	42.33	27.24	41.74	29.27	28.785	28.626	28.335	41.34	39.387	28.412	39.86	28.041	28.129	29.542	24.258	23.58	23.658	22.805	38.332	35.064	38.288	34.955	38.261	34.944	39.193	35.739	39.485	36.788	34.458
	108.23	0.5	CH					61.45	74.78	64.33	77.26	63.73	76.7	64.04	76.98	64.47	77.41	61.4	74.59	63.68	76.69	61.81	74.95	64.71	67.946	68.272	68.202	79.072	76.617	68.2	76.637	67.951	67.935	68.689	62.907	62.893	62.89	64.823	74.079	71.307	74.399	71.499	74.317	71.438	75.127	72.098	76.646	74.263	69.646
	136.81	0.71	CN					35.83	48.43	34	46.67	33.57	46.28	33.86	46.54	34	46.62	31.47	44.3	32.08	44.86	31.6	44.43	34.04	33.938	33.87	33.939	47.687	45.048	34.026	45.828	33.711	33.744	35.559	29.443	29.319	29.314	28.853	41.559	38.853	41.747	38.917	41.711	38.903	42.289	39.385	42.492	40.177	38.123
LSERIN01	175.24	0.32	COO					1.9	16.38	1.2	15.8	1.05	15.68	1.11	15.73	-2.48	12.66	-6.36	9.03	-4.88	10.4	-6.22	9.17	-2.05	-2.991	-3.42	-3.287	5.278	6.14	-3.301	6.634	-3.616	-3.613	-9.782	-8.023	-8.606	-8.592	-8.628	6.068	3.847	6.322	3.834	6.206	3.765	6.853	4.528	7.751	5.939	1.167
	55.86	0.5	CN					123.39	129.36	118.68	124.94	118.07	124.37	118.46	124.73	118.86	125.19	116.33	122.86	116.19	122.58	116.18	122.7	118.5	120.729	123.54	123.49	130.36	130.695	123.477	131.33	122.82	122.661	118.011	114.917	116.762	116.624	116.601	122.184	121.714	123.291	122.832	123.196	122.742	122.808	122.264	123.51	123.156	120.004
	63.06	0.4	CO					114.84	121.54	108.4	115.64	107.28	114.62	108.03	115.3	107.89	115.21	105.14	112.7	106.14	113.59	105.3	112.85	107.84	115.447	114.677	114.643	121.922	122.4	114.653	123.2	114.762	114.789	115.871	108.805	108.297	108.337	113.076	114.378	113.578	113.871	113.085	113.891	113.107	115.175	114.226	115.643	114.738	111.486
LTHREO01	172.31	0.39	COO					4.68	18.92	2.77	17.24	2.63	17.11	2.68	17.16	1.11	15.61	-2.53	12.44	-1.63	13.27	-2.34	12.56	1.5	0.286	0.068	0.174	9.694	9.54	0.194	10.402	-0.015	-0.008	-5.809	-4.766	-5.094	-5.075	-5.546	9.515	7.279	9.92	7.439	9.815	7.377	10.297	7.959	11.174	9.461	4.656
	61.44	0.63	CN					119.82	126.12	111.89	118.71	111.31	118.17	111.78	118.6	112.95	119.68	110.79	117.7	110.26	117.18	110.6	117.52	112.42	115.766	117.665	117.64	124.782	125.089	117.552	125.978	117.372	117.243	116.278	109.432	110.88	110.767	111.458	116.99	116.432	117.721	117.194	117.658	117.133	117.776	117.147	118.416	117.83	114.898
	67.16	0.38	CO					110.92	117.4	102.88	109.97	102.03	109.19	102.53	109.65	104.22	111.16	101.72	108.92	100.89	108.21	101.37	108.63	103.93	110.917	111	111.084	119.24	118.956	110.997	119.647	110.986	110.979	112.234	104.047	104.15	104.164	108.202	109.422	108.841	109.311	108.779	109.316	108.783	110.235	109.569	111.066	110.713	107.233
	20.69	0.33	CH3					175.74	179.31	156.9	161.76	155.28	160.26	156.21	161.12	156.5	161.36	154.66	159.68	153.97	158.99	154.29	159.36	156.22	160.894	160.617	160.603	166.447	166.651	160.67	166.526	160.709	160.723	162.933	155.355	155.162	155.203	158.823	162.64	161.83	162.465	161.663	162.479	161.674	163.146	161.964	162.785	161.917	157.698
THYMIN01	156.35	1.39	NCN					17.01	29.24	17.95	30.05	17.87	29.98	17.93	30.03	19.02	31.03	15.91	28.2	15.54	27.8	15.69	28.01	18.99	17.654	18.045	18.024	27.972	28.018	18.079	28.297	17.621	17.63	22.79	12.478	12.383	12.402	11.313	25.686	23.931	25.778	24.037	25.755	24.013	26.304	24.459	26.684	25.214	21.649
	164.36	0.82	NCO					9.73	23.68	9.95	23.81	10.05	23.9	9.99	23.84	10.75	24.47	8.07	22.06	8.55	22.49	8.24	22.21	10.73	9.868	9.763	9.629	19.302	18.624	9.651	18.909	9.426	9.517	11.783	4.653	4.169	4.264	3.457	18.888	16.429	18.913	16.457	18.896	16.447	19.67	17.096	20.301	18.29	14.095
	113.33	0.48	C					57.35	70.79	56.17	69.7	56.11	69.65	56.19	69.73	56.45	69.95	53.19	67.03	54.01	67.74	53.25	67.08	56.29	60.083	60.839	60.834	71.689	72.158	60.866	72.272	60.778	60.625	59.886	54.435	55.015	54.925	56.533	65.482	63.109	65.912	63.447	65.785	63.347	66.594	64.087	68.812	66.831	61.438
	137.15	0.5	CN					41.17	53.3	33.76	46.51	33.22	46.02	33.48	46.25	34.16	46.81	31.77	44.67	32.29	45.06	31.6	44.5	34.51	34.255	34.377	34.236	44.762	43.821	34.283	43.98	33.763	33.84	34.996	29.73	29.272	29.316	29.203	42.126	39.419	42.211	39.398	42.191	39.402	42.853	39.949	43.288	41.112	38.341
	13.82	0.47	CH3					180.37	183.55	160.5	165.15	158.64	163.43	159.47	164.2	161.1	165.71	158.47	163.28	160.59	165.24	159.23	163.99	161.56	166.173	166.649	166.654	171.448	172.455	166.599	172.233	166.192	166.172	165.564	161.164	161.107	161.119	165.267	167.192	166.514	167.157	166.492	167.15	166.484	167.595	166.507	167.629	166.544	162.157
LTYROS11	175.79	0.57	COO					-1.29	13.62	-1.38	13.54	-1.45	13.48	-1.36	13.56	-2.96	12.19	-7.13	8.33	-5.82	9.52	-6.93	8.53	-2.96	-4.089	-4.221	-4.349	9.191	7.033	-4.357	8.343	-4.542	-4.547	-9.571	-9.214	-9.65	-9.644	-9.966	5.328	3.042	5.624	3.099	5.508	3.03	6.13	3.735	6.987	4.96	0.221
	130.74	0.5	CH					40.14	54.18	40.47	54.47	39.94	53.98	40.22	54.25	41.75	55.6	39.56	53.62	39.71	53.66	39.47	53.54	41.51	42.922	43.155	42.537	57.028	52.475	42.57	52.402	42.266	42.294	37.623	38.157	37.627	37.634	38.062	50.803	47.915	50.858	47.8	50.813	47.778	51.643	48.566	52.089	49.764	46.439
	116.8	0.63	CH					55.35	68.56	55.33	68.54	54.79	68.04	55.03	68.27	57.03	70.14	53.6	66.91	55.33	68.61	54.06	67.37	56.76	58.643	58.965	58.471	72.578	69.193	58.524	69.639	58.395	58.407	59.141	53.993	53.893	53.865	54.758	66.107	63.313	66.203	63.321	66.177	63.305	67.042	63.984	68.002	65.683	61.327
	56.61	0.55	CN					116.08	122.58	116.17	122.67	115.55	122.1	115.91	122.43	116.76	123.24	114.45	121.09	113.17	119.87	114.29	120.93	116.65	119.803	121.918	121.966	130.174	129.64	122.009	130.673	121.482	121.356	120.983	113.637	115.16	115.051	115.811	120.738	120.254	121.527	121.071	121.458	121.005	121.389	120.826	122.263	121.791	118.25
	131.29	0.44	CH					40.13	54.15	40.39	54.39	39.97	53.99	40.31	54.32	41.31	55.17	39.5	53.55	39.21	53.17	39.31	53.36	41.07	41.344	41.564	41.817	49.874	52.247	41.803	52.611	41.718	41.692	44.335	36.681	37.029	37.012	35.944	50.538	47.335	50.541	47.44	50.519	47.417	51.426	48.059	52.093	49.556	46.219
	118.35	0.55	CH					54.06	67.3	54.27	67.48	53.84	67.09	54.16	67.38	54.93	68.14	52.1	65.44	53.24	66.61	52.31	65.67	54.58	55.489	55.55	56.144	62.414	67.877	56.176	68.031	55.778	55.749	55.934	50.923	51.294	51.236	50.926	63.858	60.907	63.821	60.953	63.809	60.941	64.811	61.603	65.911	63.517	59.424
	155.91	0.61	CO					14.06	28.56	13.79	28.32	13.69	28.23	13.67	28.21	14.35	28.78	12.23	26.9	11.3	25.99	11.88	26.56	14.34	16.09	16.077	16.124	26.482	27.227	16.116	27.583	16.322	16.283	16.96	9.977	10.297	10.234	10.005	23.286	20.613	23.311	20.634	23.304	20.632	24.254	21.493	25.126	23.047	19.259
	37.13	0.51	CH2					136.17	141.88	136.41	142.1	135.09	140.88	135.91	141.65	136.3	142	134.48	140.3	134.69	140.52	134.54	140.37	136.54	143.41	142.948	142.901	147.274	149.298	142.889	149.406	142.995	143.003	146.099	137.221	136.926	136.96	141.808	142.764	142.407	142.416	142.121	142.43	142.129	143.485	142.939	144.084	143.483	139.541
	123.94	0.71	C					47.59	60.51	47.85	60.74	48	60.88	47.99	60.87	50.25	62.93	47.61	60.48	47.82	60.7	47.57	60.46	50.04	52.343	52.279	52.198	61.096	59.411	52.228	59.16	52.17	52.169	50.119	46.408	46.235	46.27	47.276	59.058	56.641	59.104	56.591	59.085	56.587	60.193	57.641	61.8	59.872	55.112
URACIL	151.82	1.53	NCN					25.03	36.73	24.99	36.63	25	36.64	25.02	36.66	23.94	35.63	21.15	32.97	21.17	32.96	21.15	33.02	24.02	23.166	23.446	23.38	33.074	32.183	23.388	32.487	23.019	23.056	25.167	18.039	17.817	17.869	17.14	30.648	28.981	30.743	29.057	30.721	29.041	31.268	29.518	31.618	30.264	26.737
	171.17	1.27	CO					3.72	18.27	4.39	18.68	4.39	18.66	4.4	18.68	3.56	17.79	0.89	15.36	1	15.51	1.01	15.51	4	2.739	2.821	2.72	13.784	13.323	2.763	14.079	2.402	2.455	8.788	-2.512	-2.911	-2.843	-3.874	12.175	9.642	12.18	9.708	12.164	9.686	12.947	10.304	13.567	11.676	7.505
	100.1	1.12	CH					77.72	90.44	73.17	86.27	72.83	85.96	73.01	86.12	73.09	86.27	70.45	83.9	71.39	84.74	70.08	83.51	72.77	76.008	76.597	76.801	83.905	84.82	76.81	84.556	76.695	76.575	75.137	71.151	71.75	71.672	72.863	82.68	79.9	83.094	80.241	82.989	80.153	83.833	80.777	85.578	83.187	77.876
	147.34	1.28	CN					33.83	46.04	26.47	39.35	25.86	38.79	26.08	39	23.72	36.81	21.27	34.56	22.86	35.95	21.44	34.71	23.83	22.966	22.922	22.602	38.461	35.782	22.747	36.555	22.335	22.416	24.561	18.453	17.884	17.941	17.366	31.064	28.323	31.16	28.298	31.132	28.297	31.812	28.874	31.984	29.49	28.049
Regression						Slope		-0.930083	-0.999247	-0.999277	-1.07176	-1.00793	-1.08093	-1.00292	-1.07563	-0.988773	-1.06	-0.983477	-1.05467	-0.988451	-1.0595	-0.983188	-1.05441	-0.989767	-0.943488	-0.939691	-0.939031	-0.969648	-0.962126	-0.94002	-0.97117	-0.939586	-0.939972	-0.944751	-0.950112	-0.946308	-0.946577	-0.917553	-1.01206	-0.996022	-1.01244	-0.995696	-1.01217	-0.995564	-1.01353	-0.998284	-1.01756	-1.00612	-1.00369
						Intercept		171.604	187.042	172.614	189.058	172.642	189.223	172.628	189.131	172.191	188.403	169.222	185.439	169.795	186.032	169.237	185.452	172.215	171.61	171.548	171.469	182.521	181.81	171.548	182.958	171.378	171.398	172.192	166.81	166.599	166.617	165.985	181.244	178.215	181.383	178.272	181.334	178.242	182.166	179.014	183.264	180.774	176.746
Calculated Chemical Shifts
LALNIN12	177.9		COO					174.794	175.241	176.062	176.422	176.26	176.609	176.158	176.514	177.491	177.686	178.427	178.605	178.157	178.446	178.529	178.746	177.312	177.213	176.512	177.159	178.361	178.757	177.385	175.621	177.375	177.402	181.003	177.369	177.506	177.526	176.809	177.922	177.23	177.743	177.235	177.811	177.275	177.978	177.282	178.14	177.586	178.45
	51.1		CN					56.6925	57.8292	49.3834	50.6931	49.0793	50.4105	49.1888	50.5149	49.7611	51.048	49.9258	51.1906	50.884	52.2063	50.1044	51.4152	49.8797	52.3688	50.1979	50.5973	50.9585	51.399	51.1738	49.8274	50.8769	50.9835	51.7541	52.6057	51.2617	51.3598	53.7403	52.3526	51.7303	51.5686	50.9436	51.6324	51.0045	52.4645	51.7004	52.2678	51.8398	51.2854
	20.5		CH3					24.7907	24.4444	16.4972	16.268	16.9666	16.7288	16.7343	16.4927	18.5851	18.3894	17.8447	17.6311	17.9883	17.7725	17.6297	17.4209	17.9993	19.8478	20.4191	20.3839	22.0862	21.5836	20.2688	20.0921	20.5724	20.5228	20.6198	19.3356	19.9938	19.9392	20.0808	17.1823	17.5648	17.5174	17.9015	17.5031	17.8881	17.3599	17.8816	18.1145	18.5091	18.9646
LASCAC10	174.9		OCOH					170.246	171.174	172.834	173.689	173.025	173.885	173.029	173.879	173.674	174.474	173.962	174.734	174.213	174.95	173.78	174.55	173.195	173.201	173.234	173.293	171.304	171.923	173.156	171.954	173.294	173.235	172.498	173.459	173.646	173.555	173.28	173.462	173.101	173.579	173.14	173.544	173.12	173.56	173.199	173.355	172.78	174.003
	118.6		COH					122.403	121.461	120.832	119.715	120.602	119.471	120.797	119.667	118.669	117.531	118.995	117.761	118.899	117.811	119.734	118.508	119.896	118.894	118.646	118.574	116.634	116.278	118.377	115.047	118.482	118.569	120.518	118.954	118.605	118.69	118.308	118.774	118.998	118.717	118.952	118.725	118.956	118.734	118.941	117.82	117.8	119.495
	152.4		COH					152.193	153.287	155.377	156.433	155.547	156.612	155.598	156.658	157.201	158.267	157.892	158.893	156.965	157.86	157.567	158.544	157.062	156.703	157.364	157.33	153.393	154.27	157.043	153.09	157.075	156.993	159.951	157.215	157.542	157.45	156.441	157.949	157.858	158.075	157.996	158.067	157.972	157.942	157.885	157.276	157.288	156.992
	75.7		OCC					81.7304	82.5506	77.3831	78.2803	77.1401	78.0283	77.2705	78.1586	76.4778	77.3148	76.9222	77.7576	76.8308	77.7086	77.0143	77.8599	76.7717	74.9465	75.6842	75.675	73.3622	73.9801	75.5617	74.1746	75.2591	75.2235	75.6563	75.3039	75.5884	75.5562	74.3338	77.7483	76.9287	77.8555	77.0737	77.8516	77.0594	77.7399	76.8192	77.5491	76.9284	76.7712
	68.27		CCOH					66.0864	67.0623	70.1783	71.2388	70.0644	71.1428	70.0896	71.1563	70.4364	71.4848	70.8738	71.8937	71.6019	72.5912	71.0758	72.0817	70.1403	67.4345	68.0906	67.9534	66.4777	67.2394	67.8695	67.2492	67.5855	67.5759	68.4365	68.2122	68.3605	68.3481	66.9246	71.1972	70.4924	71.2909	70.5897	71.2775	70.5753	71.1894	70.3733	71.1985	70.8162	69.8969
	60.4		COH					56.7576	57.3496	61.6445	62.2467	61.9607	62.571	61.7954	62.4006	61.6759	62.337	61.6193	62.2646	62.953	63.5642	61.8142	62.4655	61.5986	60.0668	60.7347	60.7097	60.973	61.281	60.6107	60.8472	60.3225	60.2817	59.7391	60.5857	60.8838	60.8313	59.8998	62.0279	61.6347	62.1658	61.7609	62.1397	61.7357	62.0839	61.6583	62.2908	62.0711	61.4599
	174.9		OCOH					170.423	171.434	172.144	173.089	172.309	173.258	172.327	173.277	173.862	174.792	173.854	174.755	174.104	174.907	173.613	174.402	173.413	173.222	173.733	173.659	175.281	174.707	173.666	174.895	173.418	173.357	170.283	173.495	173.794	173.703	173.149	173.737	173.363	173.797	173.37	173.777	173.358	173.846	173.464	173.67	173.493	174.256
	118.6		COH					120.375	119.453	119.623	118.536	119.362	118.271	119.574	118.484	118.787	117.69	119.251	118.194	118.949	117.758	119.891	118.834	119.916	118.881	118.229	118.13	118.114	117.725	118.236	117.281	118.394	118.459	119.413	118.93	118.498	118.569	118.236	118.925	119.139	118.809	119.023	118.816	119.03	118.876	119.054	117.9	118.193	119.466
	155.7		COH					157.876	158.903	158.774	159.788	158.934	159.952	158.848	159.864	161.285	162.348	160.193	161.15	159.831	160.784	160.045	160.958	160.367	159.888	160.735	160.622	160.932	160.493	160.563	160.076	160.295	160.246	153.022	160.399	160.806	160.737	159.6	161.15	161.064	161.248	161.171	161.241	161.155	161.138	161.081	160.526	160.052	160.273
	76.6		OCC					81.2188	81.991	78.9819	79.7808	78.7024	79.4983	78.8551	79.6537	77.5951	78.3747	78.4171	79.1814	78.3728	79.1601	78.5972	79.3677	78.3058	76.4589	76.67	76.6836	76.6154	77.0637	76.6634	75.8819	76.7333	76.7124	75.867	76.8003	77.0429	77.0234	75.8203	79.2886	78.5333	79.3438	78.6409	79.3516	78.6364	79.2743	78.4105	79.0164	78.2655	78.3098
	68.1		CCOH					70.7275	71.6988	71.1476	72.2891	71.0724	72.2237	71.1125	72.2534	70.0705	71.188	70.4116	71.5351	71.2362	72.2945	70.5154	71.6494	69.5662	67.1184	67.586	67.5449	68.8543	69.0376	67.4437	70.4074	67.2755	67.2695	68.8248	67.8531	67.9962	67.9836	66.7071	70.7792	70.0173	70.8677	70.0998	70.8625	70.0925	70.7952	69.9191	70.7019	69.9258	69.3288
	59.1		COH					56.8692	57.4695	59.576	60.2639	59.7936	60.4956	59.6592	60.3569	59.7379	60.4184	59.79	60.4505	60.6301	61.2545	60.133	60.7679	59.9061	58.8025	58.8572	58.8955	61.1243	61.1963	58.8087	59.607	58.993	58.9836	57.7391	59.1025	59.3441	59.3196	58.6042	60.525	60.1756	60.5945	60.2484	60.5911	60.2463	60.594	60.1888	60.8245	61.0066	60.0025
ACSALA	122.11		C					125.798	123.899	123.45	121.387	123.001	120.93	123.234	121.162	122.446	120.372	122.221	120.197	122.912	120.82	122.084	120.079	122.301	122.111	121.667	121.482	122.316	121.351	121.562	120.92	121.889	121.904	122.882	121.983	121.822	121.825	122.181	120.336	120.904	120.371	120.881	120.357	120.875	120.152	120.72	119.109	119.565	121.326
	152.95		CO					158.006	157.994	158.055	157.955	157.875	157.779	157.975	157.874	157.112	157.005	156.771	156.647	157.597	157.309	156.712	156.614	156.913	154.654	154.714	154.631	157.394	155.862	154.621	154.143	154.412	154.44	154.453	155.425	155.188	155.21	154.3	156.504	156.834	156.672	156.914	156.617	156.883	156.382	156.73	156.302	156.76	156.229
	125.31		CH					128.932	126.498	126.737	124.087	126.791	124.119	126.744	124.088	125.956	123.298	125.634	123.045	126.234	123.702	125.643	123.052	125.834	125.602	125.72	125.62	126.192	125.686	125.824	126.122	125.601	125.599	125.827	125.052	124.977	125.002	125.275	123.378	124.411	123.41	124.452	123.397	124.443	123.198	124.309	122.737	123.494	124.435
	138.5		CH					142.688	141.246	141.687	140.068	141.97	140.333	141.838	140.212	140.639	139.028	139.816	138.264	138.006	136.437	140.007	138.478	140.711	141.065	141.028	141.097	139.378	140.487	141.104	141.278	141.08	141.08	141.709	140.383	140.277	140.316	140.926	139.581	140.453	139.595	140.522	139.583	140.506	139.516	140.448	139.756	140.4	139.49
	127.77		CH					132.438	129.985	129.815	127.163	129.885	127.2	129.884	127.218	128.645	126	128.417	125.819	127.469	124.962	128.592	125.983	128.833	128.383	128.461	128.425	125.183	126.093	128.518	127.787	128.381	128.39	128.716	127.829	127.732	127.774	127.895	126.669	127.746	126.681	127.776	126.678	127.774	126.471	127.628	125.738	126.541	127.261
	134.54		CH					137.879	136.47	136.22	134.666	136.245	134.691	136.132	134.575	136.032	134.459	135.528	133.992	135.258	133.619	135.661	134.145	136.356	136.637	136.758	136.752	134.558	134.96	136.67	135.79	136.568	136.567	135.821	136.081	135.964	135.98	136.593	134.721	135.732	134.877	135.819	134.837	135.793	134.639	135.667	134.916	135.757	134.952
	170.87		COO					168.721	169.185	169.616	169.991	169.86	170.232	169.659	170.039	171.074	171.39	171.798	172.076	172.77	172.947	171.686	171.966	170.928	171.075	170.707	170.66	171.444	171.159	170.716	171.058	170.939	170.928	168.992	171.073	171.028	170.999	170.676	171.554	171.101	171.566	171.02	171.551	171.024	171.656	171.206	171.793	172.052	172.066
	172.23		CO					173.948	174.461	175.232	175.661	175.131	175.561	175.065	175.492	174.782	175.418	175.86	176.211	174.124	174.727	176.1	176.479	175.56	174.819	175.241	175.042	178.297	177.559	174.895	175.936	174.835	174.806	172.752	175.239	175.243	175.209	173.806	175.899	175.671	175.773	175.579	175.799	175.594	175.932	175.699	176.055	176.082	176.71
	19.79		CH3					24.8744	24.0647	16.9069	16.1608	16.8759	16.1127	16.9149	16.1592	17.1613	16.5026	17.4022	16.7135	15.7544	15.272	17.6985	16.9886	17.4253	20.7375	19.9098	19.9971	15.194	14.4533	20.5752	22.0441	21.1146	21.0717	22.3138	19.4325	19.8159	19.7811	21.057	16.738	17.4183	16.7561	17.4962	16.7652	17.4938	16.9302	17.8356	17.5986	18.3381	18.9585
LCYSTN21	173.55		COO					169.149	170.155	170.765	171.642	170.928	171.799	170.873	171.739	172.171	172.958	172.978	173.764	172.286	173.075	172.993	173.748	172.334	172.561	172.229	172.91	172.299	173.967	172.977	173.776	172.999	172.991	177.592	172.618	173.007	173.009	172.223	173.012	172.324	173.007	172.475	173.052	172.496	173.128	172.436	173.354	173.185	173.628
	28.28		CS					22.6236	23.4152	27.8989	28.7112	27.7515	28.5758	27.7464	28.5505	29.521	30.3674	29.3711	30.2027	28.3077	29.2045	29.0937	29.9262	28.8571	28.4297	29.5482	29.4484	30.6676	30.8816	29.3503	30.133	29.4196	29.3613	29.5241	28.8966	29.683	29.6406	27.8946	28.4385	28.1953	29.0136	28.7665	28.9811	28.7387	28.5239	28.2467	28.9057	28.8299	28.9814
	56.19		CN					56.5065	57.4895	55.1692	56.277	54.9555	56.0746	55.106	56.2265	55.3477	56.4752	55.4234	56.5588	55.8658	57.0801	55.3645	56.508	55.3432	57.7326	55.7036	55.6192	55.479	56.048	55.6041	55.2717	56.2081	56.3113	59.1269	57.8379	56.4806	56.5963	59.0144	57.9675	57.3369	57.1249	56.4966	57.1821	56.5508	58.1038	57.3138	58.0241	57.2055	56.881
CYTSIN	159.64		CO					154.863	156.305	155.337	156.883	155.225	156.796	155.277	156.83	155.847	157.408	156.063	157.596	157.399	158.856	155.945	157.489	155.844	157.075	157.003	156.952	158.479	158.062	156.954	158.398	156.98	156.993	152.153	157.202	157.241	157.239	157.756	157.053	156.498	157.031	156.364	157.022	156.373	157.287	156.69	157.728	157.424	157.27
	167.8		NCN					161.811	163.24	163.531	165.104	163.379	164.978	163.401	164.994	162.768	164.266	162.298	163.829	163.004	164.493	162.306	163.847	163.119	164.853	164.794	164.767	165.156	164.532	164.784	164.725	164.682	164.71	163.293	165.095	165.025	165.041	166.524	164.22	164.018	164.3	163.926	164.279	163.921	164.346	164.12	164.925	164.866	164.047
	92.73		CH					89.4501	87.397	91.273	89.0087	91.231	88.9349	91.3314	89.0548	92.0806	89.7379	92.3038	89.9285	93.5356	91.2914	91.8998	89.6061	91.9547	92.6077	92.018	92.0283	93.1828	93.0081	92.0562	93.5805	92.306	92.3583	92.2952	91.6287	91.4665	91.5004	91.9399	90.3687	91.2435	89.947	90.9168	90.0188	90.9774	90.111	91.0997	89.1075	89.8832	91.0095
	144.72		CN					143.599	144.414	143.355	144.269	143.633	144.549	143.463	144.374	143.882	144.805	143.081	144.033	141.92	142.974	143.34	144.299	143.898	145.925	145.836	145.885	145.009	145.394	145.852	145.217	145.997	145.998	145.604	145.118	145.126	145.151	146.383	145.047	145.261	144.973	145.25	144.979	145.247	145.222	145.48	146.061	146.235	143.953
GLUCSA11	92.85		OCO					98.0347	98.6885	100.127	100.723	100.121	100.717	100.087	100.693	96.8959	97.7197	97.3785	98.1232	98.5471	99.3013	97.1402	97.8727	96.4483	91.9406	92.5404	92.5663	92.8221	92.5405	92.5375	93.1075	92.105	92.0763	90.8413	93.1365	93.2447	93.2269	91.1462	96.9046	96.1589	97.113	96.3255	97.0665	96.2877	96.8145	95.9843	97.136	96.6423	95.9798
	70.43		COH					71.239	72.0885	70.8578	71.9569	70.8103	71.9318	70.9019	72.0168	70.8813	71.9936	71.041	72.1257	72.531	73.5659	70.8202	71.9025	70.8133	68.1987	69.019	69.0708	68.8679	69.1935	68.8236	68.9429	68.4913	68.4444	67.7232	69.2355	69.5094	69.4612	68.1725	71.3854	70.7025	71.5754	70.8994	71.5306	70.858	71.2837	70.4811	71.3399	70.6321	70.1338
	72.57		COH					69.1091	70.15	73.8556	75.1079	73.9349	75.1963	73.9207	75.1684	73.2544	74.5694	73.7948	75.0577	74.9824	76.1723	73.5436	74.8232	73.9311	71.0131	71.7291	71.7377	71.866	71.7326	71.749	72.5634	71.3401	71.2869	68.5603	72.1599	72.4514	72.3899	70.8618	74.5137	73.9018	74.7504	74.1045	74.7057	74.0677	74.4074	73.6936	74.4313	73.9895	73.1328
	73		COH					70.5415	71.6089	73.396	74.5398	73.3604	74.5261	73.329	74.4907	74.6189	75.7142	74.3848	75.4795	75.4074	76.416	74.2417	75.3399	74.7229	71.6924	72.6678	72.7509	73.2604	72.3676	72.6739	70.6997	71.9086	71.8763	70.1597	72.9637	73.1044	73.0649	71.7317	75.128	74.5332	75.3194	74.6711	75.2918	74.6511	74.9496	74.2546	74.8251	74.39	73.7491
	71.57		CO					75.7313	76.5851	77.3231	78.3124	77.3014	78.2985	77.2805	78.2662	72.6413	73.7426	72.8113	73.8553	73.4602	74.4877	72.6883	73.7372	72.4563	70.3338	71.0121	70.9611	70.3592	70.5674	70.9415	70.0626	70.5847	70.5443	71.7705	71.1044	71.3726	71.3269	70.1397	73.3944	72.582	73.5375	72.7334	73.5043	72.7028	73.3452	72.4068	73.3689	72.4763	72.0046
	63.64		COH					57.7435	58.4488	65.5217	66.2229	65.8009	66.4948	65.6065	66.3052	65.5914	66.3226	65.4057	66.1246	65.8491	66.4885	65.0489	65.7552	65.3597	63.2973	63.831	63.909	64.2233	63.922	63.9383	62.9178	63.66	63.6008	63.5257	63.9415	64.3056	64.2361	63.0736	65.6825	65.318	65.8754	65.5057	65.8402	65.472	65.7194	65.299	65.9275	65.682	64.9778
HXACAN26	132.84		CN					136.429	136.8	130.864	131.375	130.419	130.961	130.535	131.069	131.76	132.18	131.613	132.115	131.334	131.701	131.483	131.962	131.684	131.66	131.751	131.621	133.994	132.414	131.636	132.53	131.579	131.596	133.396	132.08	132.045	132.06	132.084	131.795	131.806	131.907	131.888	131.878	131.868	131.68	131.659	131.419	131.196	131.294
	123.31		CH					121.194	119.653	122.95	121.483	123.001	121.514	122.903	121.431	123.464	121.994	123.077	121.632	122.26	120.83	122.998	121.587	123.37	124.469	123.887	123.846	122.007	121.598	124.21	123.495	124.264	124.291	122.668	123.827	123.631	123.664	124.885	122.115	122.83	122.237	122.851	122.218	122.849	122.107	122.814	122.255	122.514	122.509
	115.64		CH					122.235	120.502	114.296	112.705	114.202	112.607	114.258	112.665	115.218	113.577	114.894	113.331	114.392	112.81	114.631	113.056	115.076	116.384	115.722	115.787	113.889	115.251	116.121	115.453	116.216	116.239	116.772	115.562	115.35	115.387	116.528	113.655	114.511	113.764	114.539	113.748	114.537	113.564	114.522	113.506	113.996	114.145
	152.15		CO					155.709	155.186	156.076	155.747	155.97	155.639	156.07	155.744	154.522	154.366	153.093	152.934	155.314	155.084	153.624	153.472	154.449	152.788	152.739	152.672	149.845	151.671	152.536	151.95	152.439	152.501	152.556	153.735	153.311	153.381	153.174	154.077	154.071	154.112	154.065	154.101	154.063	153.968	153.934	154.008	153.889	153.78
	116.29		CH					122.031	120.482	116.365	114.924	116.48	115.028	116.575	115.128	114.981	113.503	115.081	113.637	113.888	112.407	114.867	113.404	114.878	115.384	116.005	115.942	115.827	115.639	115.57	115.119	115.55	115.537	114.705	114.62	114.677	114.69	115.086	113.376	114.141	113.369	114.179	113.372	114.184	113.29	114.151	113.199	113.678	114.098
	120.51		CH					117.055	115.536	118.054	116.596	118.163	116.693	118.19	116.72	120.261	118.803	119.271	117.824	119.749	118.383	119.498	118.054	120.608	121.117	121.702	121.545	125.288	123.074	121.265	121.824	121.224	121.23	119.29	120.518	120.579	120.604	121.258	119.296	119.986	119.247	119.987	119.255	119.997	119.272	120.028	119.345	119.707	119.674
	169.86		NCO					164.508	165.748	165.829	167.065	165.526	166.805	165.477	166.748	166.189	167.584	166.369	167.731	166.879	168.211	166.199	167.527	166.039	167.575	167.786	167.804	169.513	169.219	167.792	169.725	167.691	167.652	164.655	167.57	167.672	167.63	168.223	166.969	166.785	166.959	166.774	166.957	166.772	167.054	166.881	167.347	167.607	167.233
	23.73		CH2					15.7782	15.1514	19.9846	19.3761	20.0408	19.4203	20.0038	19.3861	19.653	19.142	19.8904	19.4029	18.6506	18.2492	19.6059	19.1079	19.5038	22.7009	22.6265	22.6771	23.6571	23.8235	22.6517	23.5446	22.9402	22.9112	24.6794	21.4572	21.7284	21.7045	23.0738	18.8168	19.4731	18.7637	19.4737	18.7744	19.478	18.9917	19.8911	19.5655	20.2387	20.8736
PYRIDO11	164.27		CO					162.545	163.33	162.711	163.539	162.502	163.357	162.599	163.435	159.891	160.811	159.672	160.549	159.88	160.89	159.72	160.674	159.942	161.626	161.237	161.15	162.105	161.61	161.173	162.178	161.367	161.402	158.831	161.78	161.638	161.655	162.752	160.834	160.547	160.799	160.407	160.794	160.419	161.018	160.717	161.578	161.461	160.974
	121.78		CH					122.701	119.573	123.45	120.165	123.475	120.163	123.485	120.194	122.169	118.92	122.192	118.974	121.262	117.98	121.907	118.708	122.143	120.651	120.715	120.478	124	120.445	120.497	121.539	120.214	120.273	120.525	120.119	119.656	119.713	119.418	118.836	120.096	118.837	119.957	118.836	119.981	118.421	119.77	116.849	117.807	120.015
	143.18		CH					137.954	137.06	142.976	141.922	143.2	142.138	143.112	142.051	143.171	142.134	142.618	141.597	142.088	141.183	142.455	141.441	143.244	144.451	144.648	144.862	142.436	143.915	144.84	144.247	145.031	144.957	144.282	143.762	144.285	144.223	145.06	142.45	143.291	142.619	143.468	142.607	143.453	142.442	143.336	143.086	143.761	142.161
	108.23		CH					114.451	112.318	108.331	106.253	108.406	106.316	108.401	106.329	108.445	106.348	108.836	106.771	106.85	104.779	108.466	106.424	108.167	107.503	107.393	107.426	105.849	108.095	107.439	108.531	107.532	107.541	107.298	107.041	107.083	107.087	106.506	106.271	107.192	106.059	107.081	106.112	107.12	106.022	107.039	105.272	106.057	106.843
	136.81		CN					138.279	138.648	138.639	139.039	138.805	139.198	138.669	139.072	138.573	138.985	138.272	138.717	138.085	138.503	138.169	138.605	138.523	139.59	139.72	139.6	136.282	138.469	139.563	138.451	139.703	139.679	138.597	138.836	138.854	138.869	139.51	139.184	139.517	139.117	139.523	139.115	139.511	139.305	139.696	140.026	140.351	138.482
LSERIN01	175.24		COO					169.837	170.674	171.415	172.124	171.583	172.275	171.515	172.212	174.643	174.983	175.476	175.915	174.618	175.013	175.353	175.783	174.244	174.432	174.761	174.556	177.404	175.903	174.651	176.516	174.775	174.794	181.433	174.433	174.743	174.75	173.901	175.103	174.383	174.982	174.455	175.052	174.493	175.22	174.493	175.377	174.799	175.575
	55.86		CN					56.8413	57.7793	54.02	55.1516	53.6351	54.7883	53.8222	54.968	54.6655	55.7014	54.8137	55.8627	54.9465	56.1583	55.0105	56.0757	54.9275	57.7033	55.4583	55.5084	56.118	56.0653	55.4772	55.4145	55.9779	56.0998	60.7009	57.6261	56.1058	56.2234	58.9969	57.5859	56.9853	56.5589	55.9689	56.6385	56.0441	57.6963	56.9594	57.5856	56.8644	56.2989
	63.06		CO					64.7936	65.5934	64.2926	65.119	64.5107	65.3274	64.2827	65.1112	65.5123	66.2802	65.8188	66.5781	64.8804	65.6832	65.7076	66.4617	65.4785	62.6868	63.7868	63.816	64.2999	64.0461	63.772	63.3101	63.5491	63.4992	62.7226	63.4332	64.1163	64.0676	62.2313	65.4861	65.089	66.0961	65.674	66.0568	65.6363	65.4326	64.9836	65.5907	65.3339	64.8483
LTHREO01	172.31		COO					167.251	168.136	169.846	170.581	169.991	170.729	169.94	170.674	171.093	171.856	171.71	172.319	171.406	171.973	171.538	172.209	170.73	171.34	171.484	171.306	173.122	172.632	171.366	172.856	171.392	171.405	177.68	171.338	171.419	171.421	171.073	171.614	170.965	171.34	170.865	171.399	170.897	171.729	171.068	171.894	171.255	172.073
	61.44		CN					60.1617	61.0168	60.8051	61.8287	60.4488	61.4901	60.5217	61.5616	60.5091	61.542	60.2621	61.3048	60.808	61.8796	60.4967	61.5376	60.9453	62.3858	60.979	61.0017	61.5267	61.459	61.0468	60.6122	61.0968	61.1926	62.3381	62.8374	61.672	61.7675	63.7159	62.8426	62.2463	62.1982	61.5826	62.2439	61.6282	62.7964	62.0676	62.769	62.223	61.4237
	67.16		CO					68.4395	69.7303	69.8086	71.1959	69.8024	71.1968	69.7987	71.1885	69.1411	70.5732	69.1823	70.5648	70.0698	71.3834	69.5716	70.9113	69.3485	66.9608	67.2421	67.158	66.9005	67.3597	67.2087	66.7607	67.097	67.0805	66.1587	67.9538	68.0407	68.0177	66.7035	70.5019	69.8071	70.7128	69.9614	70.6874	69.9411	70.4394	69.6326	70.2481	69.3835	69.117
	20.69		CH3					8.15151	7.86687	15.8276	15.6893	16.13	15.9938	15.9621	15.8258	17.448	17.3612	17.117	17.0299	17.6028	17.5817	17.5412	17.4209	17.5935	19.8081	20.6174	20.6581	21.1263	21.4711	20.5151	21.2332	20.3779	20.3226	18.2608	19.2054	19.7676	19.7054	20.256	16.6419	17.0289	16.8978	17.3051	16.8776	17.2848	16.8126	17.3275	17.621	17.8662	18.4657
THYMIN01	156.35		NCN					155.784	157.824	154.677	156.851	154.63	156.817	154.646	156.83	153.385	155.511	153.574	155.697	154.434	156.578	153.811	155.918	153.419	154.953	154.591	154.544	155.398	154.854	154.553	155.477	154.821	154.826	150.661	154.955	154.881	154.877	155.604	155.248	154.379	155.285	154.339	155.265	154.335	155.506	154.597	156.112	155.406	155.017
	164.36		NCO					162.555	163.38	162.671	163.539	162.512	163.389	162.609	163.488	161.562	162.464	161.285	162.173	161.343	162.204	161.136	162.034	161.595	162.299	162.374	162.427	163.805	163.892	162.476	164.594	162.521	162.452	161.06	162.389	162.654	162.581	162.813	162.128	161.851	162.235	161.886	162.208	161.868	162.23	161.947	162.607	162.372	162.599
	113.33		C					118.264	116.305	116.485	114.356	116.087	113.937	116.274	114.128	116.375	114.256	116.91	114.745	116.408	114.261	116.883	114.722	116.501	114.922	114.378	114.344	113.008	112.385	114.333	112.77	114.272	114.412	115.615	115.091	114.538	114.626	114.113	114.972	115.357	114.651	115.098	114.748	115.176	114.671	115.037	113.244	113.534	115.081
	137.15		CN					133.313	133.782	138.879	139.21	139.158	139.479	139.05	139.384	138.415	138.784	137.976	138.327	137.878	138.291	138.169	138.531	138.058	139.29	139.244	139.321	139.118	139.649	139.321	140.246	139.655	139.589	139.129	138.563	138.898	138.867	139.189	138.61	138.953	138.647	139.044	138.629	139.014	138.733	139.133	139.216	139.41	138.263
	13.82		CH3					3.84522	3.63006	12.2302	12.056	12.7434	12.5672	12.6926	12.5129	12.8997	12.7502	13.3699	13.2331	11.0593	10.9598	12.6843	12.5389	12.3082	14.8275	14.9492	14.9761	16.2771	15.8869	14.9417	15.6907	15.2262	15.2006	15.7751	13.6862	14.1418	14.1054	14.3433	12.035	12.3635	12.1474	12.4968	12.1497	12.4961	12.3034	12.7923	12.6919	13.2109	13.9903
LTYROS11	175.79		COO					172.804	173.432	173.993	174.546	174.103	174.653	173.992	174.546	175.118	175.481	176.234	176.654	175.547	175.946	176.051	176.458	175.145	175.468	175.514	175.553	173.609	175.044	175.644	174.856	175.645	175.672	181.234	175.564	175.731	175.746	175.129	175.852	175.185	175.689	175.187	175.759	175.225	175.953	175.285	176.155	175.784	176.524
	130.74		CH					134.271	132.903	132.173	130.679	132.385	130.875	132.291	130.778	130.91	129.467	130.315	128.888	130.543	129.179	130.431	128.999	131.13	131.113	130.995	131.526	127.224	131.323	131.531	132.067	131.665	131.643	136.647	130.557	130.992	130.993	131.061	129.828	130.491	129.893	130.678	129.902	130.676	129.824	130.531	130.261	130.705	130.135
	116.8		CH					120.124	118.534	117.324	115.599	117.417	115.677	117.437	115.698	115.801	114.054	116.507	114.871	115.104	113.34	116.086	114.416	116.036	116.281	116.139	116.563	112.146	115.238	116.534	115.327	116.511	116.497	116.318	115.511	115.599	115.63	115.741	114.339	115.154	114.357	115.224	114.351	115.217	114.217	115.139	114.068	114.689	115.192
	56.61		CN					63.6403	64.5542	56.5282	57.5845	56.1751	57.242	56.3797	57.442	56.7419	57.7684	56.6626	57.7295	57.9316	59.0295	56.8688	57.942	56.7586	58.577	56.9825	56.9395	56.2983	57.0803	56.8572	56.0526	57.2351	57.3264	57.8931	58.8422	57.6218	57.7123	59.7218	59.0494	58.4395	58.3449	57.7223	58.3977	57.7733	59.1345	58.3949	58.8545	58.2377	58.0593
	131.29		CH					134.28	132.933	132.253	130.765	132.355	130.864	132.2	130.703	131.345	129.922	130.374	128.962	131.037	129.698	130.588	129.189	131.565	132.602	132.49	132.202	134.161	131.542	132.252	131.864	132.18	132.208	130.306	131.959	131.558	131.582	133.004	130.096	131.068	130.214	131.036	130.2	131.035	130.044	131.037	130.257	130.915	130.356
	118.35		CH					121.324	119.793	118.383	116.735	118.375	116.704	118.31	116.655	117.878	116.174	117.982	116.422	117.17	115.459	117.807	116.209	118.193	119.256	119.348	118.748	122.002	116.504	118.741	116.889	118.97	118.995	119.348	118.428	118.059	118.118	119.257	116.616	117.55	116.768	117.582	116.748	117.571	116.478	117.516	116.196	116.868	117.103
	155.91		CO					158.527	158.503	158.834	158.705	158.843	158.709	158.918	158.788	158.002	157.896	157.194	157.069	158.625	158.496	157.557	157.447	158.022	156.429	156.44	156.328	156.843	155.615	156.399	156.17	156.042	156.092	156.169	157.331	156.855	156.93	156.804	157.677	157.684	157.782	157.727	157.746	157.701	157.584	157.557	157.697	157.586	157.416
	37.13		CH2					44.9549	45.2687	36.3028	36.7601	36.4802	36.9422	36.3213	36.7683	37.4213	37.8828	36.9635	37.4694	36.6602	37.1508	36.9592	37.4442	37.0721	36.3041	37.2208	37.2809	39.7173	38.1669	37.2296	37.8596	37.0218	36.9789	34.1647	36.4348	37.0245	36.9738	35.8682	36.7577	36.3746	37.1961	36.7629	37.1705	36.7431	36.7396	36.3199	36.6503	36.413	36.6897
	123.94		C					127.342	126.577	124.799	123.959	124.261	123.417	124.498	123.658	122.505	121.697	122.398	121.653	122.527	121.72	122.467	121.702	122.687	122.225	122.422	122.454	123.28	124.65	122.453	125.504	122.36	122.36	124.842	122.717	122.846	122.819	122.606	121.473	121.799	121.544	121.925	121.53	121.906	121.158	121.471	120.379	120.536	121.43
URACIL	151.82		NCN					148.324	150.34	147.642	149.799	147.443	149.618	147.535	149.699	148.52	150.635	148.421	150.667	148.869	151.111	148.443	150.636	148.441	149.753	149.516	149.515	150.451	150.846	149.563	151.408	149.749	149.726	148.415	149.671	149.738	149.703	150.258	150.226	149.349	150.258	149.34	150.239	149.329	150.475	149.546	151.091	150.325	149.91
	171.17		CO					168.144	168.786	168.227	169.037	168.217	169.053	168.215	169.039	168.671	169.545	168.346	169.239	168.806	169.599	168.244	169.098	168.256	169.025	168.897	168.915	169.156	168.992	168.951	169.285	169.121	169.09	163.889	169.197	169.353	169.308	169.539	168.922	168.611	169.052	168.606	169.022	168.599	169.044	168.727	169.459	169.026	169.213
	100.1		CH					99.3182	96.67	99.4971	96.5967	99.234	96.3068	99.4049	96.4981	99.9216	96.9565	99.9356	96.9525	99.2291	96.2499	100.336	97.3982	100.19	99.897	99.5702	99.3508	101.163	100.203	99.3451	100.84	99.3163	99.4194	101.206	99.2087	98.7011	98.7739	99.1289	97.5665	98.633	97.2558	98.3766	97.3348	98.4441	97.1986	98.3752	96.1836	97.0779	98.5824
	147.34		CN					140.14	141.037	146.163	146.884	146.577	147.294	146.472	147.182	148.737	149.384	148.303	148.99	147.199	147.943	148.158	148.854	148.629	149.942	150.008	150.245	145.228	147.384	150.165	147.457	150.392	150.327	148.988	149.278	149.675	149.634	150.05	149.805	150.005	149.836	150.096	149.823	150.07	149.923	150.189	150.719	151.103	148.593
					Geometry			Unoptimised Structure		rSCAN H Atoms Only		PBE H Atoms Only		BLYP H Atoms Only		rSCAN Unfixed Cell		PBE+D3 Unfixed Cell		PBE Unfixed Cell		PBE+D3 Fixed Cell		rSCAN Fully Optimised Geometry
					GIPAW Calculation			PBE	rSCAN	PBE	rSCAN	PBE	rSCAN	PBE	rSCAN	PBE	rSCAN	PBE	rSCAN	PBE	rSCAN	PBE	rSCAN	PBE GIPAW
					Correction			None	None	None	None	None	None	None	None	None	None	None	None	None	None	None	None	None	PBE0	PBE0 Cluster	PBE0-CPCM Cluster	PBE0 On Cluster Directly	PBE0-CPCM On Cluster Directly	PBE0-CPCM Cluster Optimisation	PBE0-CPCM on Optimised Cluster Directly	PBE0-SMD	PBE0-CPCM	PBE0 Optimised Molecule	B3LYP	B3LYP-SMD	B3LYP-CPCM	CAM-B3LYP	rSCAN		rSCAN-SMD		rSCAN-CPCM		SCAN		r2SCAN		TPSS
																																							+MS	+D	+MS	+D	+MS	+D	+MS	+D	+MS	+D	+MS
						RMSE		4.4179	4.1757	2.52257	2.60635	2.51414	2.59769	2.51855	2.59599	2.08107	2.33868	2.11766	2.39114	2.2735	2.67784	2.12921	2.39876	2.07224	1.53853	1.53292	1.5165	2.06092	1.653	1.49617	1.46861	1.51432	1.50787	2.93588	1.51388	1.46053	1.45778	1.60707	2.3048	2.09469	2.30936	2.11177	2.30432	2.10462	2.29997	2.03492	2.33426	2.11085	1.74446
						MAX		12.5385	12.8231	7.27662	7.87304	7.27096	7.86699	7.23684	7.84309	5.58482	6.64786	5.50214	6.49308	5.69708	6.45129	5.4941	6.14374	4.68101	4.30256	5.03473	4.9304	6.06656	5.33667	4.86298	4.37554	4.67451	4.59267	7.55071	4.81495	5.14158	5.05029	4.04108	5.54928	5.45844	5.67482	5.59586	5.66686	5.57188	5.54237	5.48485	4.9308	4.8881	4.59223
						MAE		3.78018	3.46325	2.09099	2.11011	2.09309	2.10393	2.09545	2.09884	1.59483	1.914	1.62545	1.97151	1.84952	2.26414	1.66927	1.99653	1.63264	1.22574	1.09312	1.0697	1.53197	1.21119	1.07714	1.1294	1.09067	1.09222	2.21107	1.13791	1.01652	1.02443	1.34627	1.95548	1.71992	1.93093	1.70025	1.92644	1.69389	1.95212	1.66376	1.97457	1.76794	1.41825
						IQR		7.08293	6.22928	3.52542	3.61073	3.64251	3.81707	3.61771	3.69517	2.4704	3.81885	2.39645	3.64694	3.20036	4.54659	2.41144	3.78723	2.58134	1.99676	1.53196	1.40429	2.23655	1.67984	1.50938	1.67422	1.5382	1.55006	2.86836	1.83346	1.40615	1.41605	2.60073	3.75619	3.16454	3.74867	3.2473	3.72792	3.23376	3.9123	3.27774	3.88149	3.48195	2.50057
						Slope		-0.930083	-0.999247	-0.999277	-1.07176	-1.00793	-1.08093	-1.00292	-1.07563	-0.988773	-1.06	-0.983477	-1.05467	-0.988451	-1.0595	-0.983188	-1.05441	-0.989767	-0.943488	-0.939691	-0.939031	-0.969648	-0.962126	-0.94002	-0.97117	-0.939586	-0.939972	-0.944751	-0.950112	-0.946308	-0.946577	-0.917553	-1.01206	-0.996022	-1.01244	-0.995696	-1.01217	-0.995564	-1.01353	-0.998284	-1.01756	-1.00612	-1.00369
						Intercept		171.604	187.042	172.614	189.058	172.642	189.223	172.628	189.131	172.191	188.403	169.222	185.439	169.795	186.032	169.237	185.452	172.215	171.61	171.548	171.469	182.521	181.81	171.548	182.958	171.378	171.398	172.192	166.81	166.599	166.617	165.985	181.244	178.215	181.383	178.272	181.334	178.242	182.166	179.014	183.264	180.774	176.746
[truncated: 166 more columns]
